# Supplementary material for: Gastrointestinal Cancer Therapeutics via Triggering Unfolded Protein Response and Endoplasmic Reticulum Stress by 2-Arylbenzofuran
Source: MDPI journal article supplement (doi:10.3390/ijms25020999), 2024-01-13
Supplement: s1 [file ijms-2798366-supplementary.pdf › ijms-2798366-supplementary.pdf]

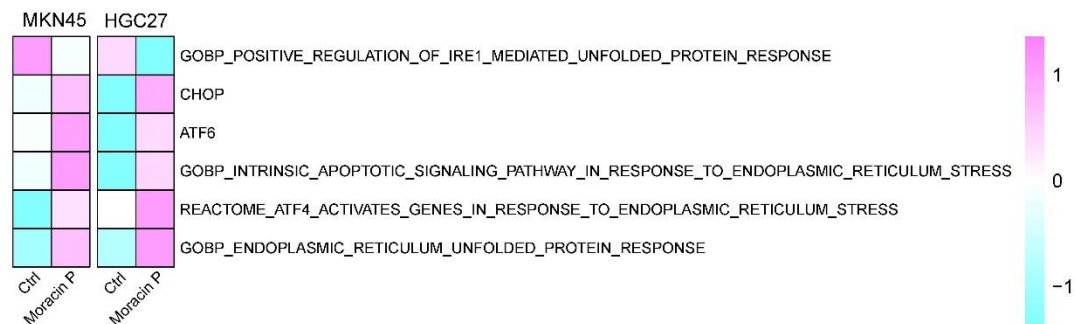

**Figure S1.** Gene Set Variation Analysis (GSVA) was conducted on pathways associated with the Unfolded Protein Response and Apoptosis, comparing cells treated with Moracin P to those treated with DMSO (used as the control, Ctrl).

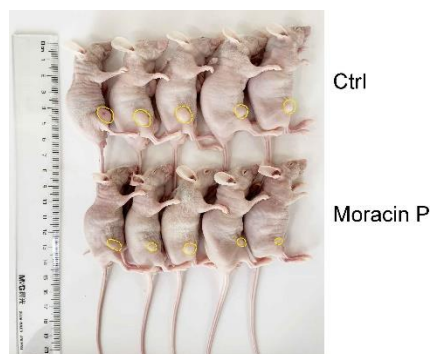

**Figure S2.** Images showcase tumors in the abdominal subcutaneous region of nude mice after intravenous (i.v.) injection of MKN 45 cells, followed by treatment with either Moracin P or DMSO (serving as the control, Ctrl).
